# Supplementary material for: Does Sympathy Motivate Prosocial Behaviour in Great Apes?
Source: PLoS One. 2014 Jan 8;9(1):e84299. doi: 10.1371/journal.pone.0084299 (PMC3885567; doi:10.1371/journal.pone.0084299)
Supplement: Table S2 — Tested dyads. They consist of the victim (first name) and the helper, shown for each species and population. (DOCX) [file pone.0084299.s002.docx]

**Table S2. Tested dyads.** They consist of the victim (first name) and the helper, shown for each species and population.

| **Species** | **Population** | **Dyad** |
| --- | --- | --- |
| Orangutans | WKPRC | Bimbo - Dokana |
|  |  | Bimbo - Kila |
| Dokana - Dunja |
| Dokana - Padana |
| Dokana - Pini |
| Dunja - Bimbo |
| Dunja - Padana |
| Dunja - Pini |
| Kila - Dokana |
| Kila - Dunja |
| Kila - Padana |
| Padana - Bimbo |
| Padana - Pini |
| Pini - Bimbo |
| Pini - Kila |
| Pini - Raja |
| Raja - Dokana |
| Raja - Dunja |
| OCCQ | Bali - Sabin |
|  | Diva - Mercedes |
| Edwin - Roland |
| Kraba - Harry |
| Mercedes - Salih |
| Roland -Yasmin |
| Sabin - Mercedes |
| Salih - Kraba |
| Sam - Diva |
| Ulin - Galih |
| Yasmin - Jabang |
| Gorillas | WKPRC | Gorgo - Viringika |
|  |  | Kibara - Gorgo |
| Louna - Kibara |
| Louna - Viringika |
| Viringika - Kibara |
| Bonobos | WKPRC | Joey - Kuno |
|  |  | Joey - Limbuko |
| Joey - Yasa |
| Limbuko - Kuno |
| Luisa - Joey |
| Luisa - Ulindi |
| Ulindi - Joey |
| Ulindi - Kuno |
| Ulindi - Limbuko |
| Yasa - Kuno |
| Yasa - Luisa |
| Yasa - Ulindi |

**Table S2** continued**.**

| **Species** | **Population** | **Dyad** |
| --- | --- | --- |
| Chimpanzees | WKPRC | Alex - Alexandra |
|  |  | Alex - Annett |
| Alex - Getruida |
| Alexandra - Fifi |
| Alexandra - Jahaga |
| Annett - Alexandra |
| Annett - Gertruida |
| Fifi - Alex |
| Fifi - Annett |
| Fifi - Gertruida |
| Gertruida - Alexandra |
| Gertruida - Jahaga |
| Jahaga - Alex |
| Jahaga - Annett |
| Jahaga - Fifi |
| Ngamba Island | Bili - Asega |
|  | Indi - Ikuru |
| Kalema - Umutama |
| Kazahukire - Yoyo |
| Kidogo - Mawa |
| Mawa - Pasa |
| Namukisa - Sophie |
| Nkuumwa - Bwambale |
| Okech - Robbie |
| Sally - Becky |
| Tumbo - Baluku |
| Umugenzi - Nani |

WKPRC = Wolfgang Köhler Primate Research Center, Leipzig, Germany; OCCQ = Orangutan Care Center and Quarantine Pasir Panjang, Kalimantan, Indonesia
